# Supplementary material for: Does the Domestication Syndrome Apply to the Domestic Pig? Not Completely
Source: MDPI journal article supplement (doi:10.3390/ani12182458), 2022-09-17
Supplement: s1 [file s1]

# DOES THE DOMESTICATION SYNDROME APPLY TO THE DOMESTIC PIG? NOT COMPLETELY

Edoardo Collarini<sup>1</sup>, Marika Gioia<sup>1</sup>, Giada Cordoni<sup>1,2</sup> and Ivan Norscia<sup>1,2</sup>

## List of supporting material

- Data calculation sheet;
- Video examples showing piglets and hybrids during play fight and real fight (video legends below)

## Legends of supplementary videos (S1-S4)

### Video\_S1

Fragment of play fight sequence between two wild boar hybrids. A play kneeling (a play signal) is performed by the darker, striped individual.

### Video\_S2

Fragment of play fight sequence between piglets. Hopping (a play signal) is performed by the individual with only one black patch on the back.

### Video\_S3

Fragment of real fight sequence between wild boar hybrids. No play signals are present whereas attempt bites are present. One of the two individual flees.

### Video\_S4

Fragment of real fight sequence between piglets. No play signals are present whereas attempt bites are present. One of the two individual flees.
